# Supplementary material for: Rapid synthesis of active Pt single atoms and Ru clusters on carbon black via a highly efficient microwave strategy for the hydrogen evolution reaction in acidic and alkaline media
Source: Royal Society of Chemistry journal article supplement (doi:10.1039/d3ta05396b), 2024-01-01
Supplement: d3ta05396b1.pdf [file d3ta05396b1.pdf]

*Supporting Information*

**Rapid synthesis of active Pt single atoms and Ru clusters on carbon  
black via high-efficiency microwave strategy for hydrogen evolution  
reaction in acidic and alkaline media**

Xinyu Zhu<sup>a</sup>, Minghao Fang<sup>a, \*</sup>, Bozhi Yang<sup>a</sup>, Meiling Zhan<sup>a</sup>, Shaorou Ke<sup>a</sup>, Fan Yang<sup>a</sup>,  
Xiaowen Wu<sup>a</sup>, Yangai Liu<sup>a</sup>, Zhaohui Huang<sup>a</sup>, Xin Min<sup>a, \*</sup>

<sup>a</sup> *Engineering Research Center of Ministry of Education for Geological Carbon Storage and Low Carbon  
Utilization of Resources, Beijing Key Laboratory of Materials Utilization of Nonmetallic Minerals and Solid  
Wastes, National Laboratory of Mineral Materials, School of Materials Science and Technology, China University  
of Geosciences (Beijing), Beijing 100083, PR China*

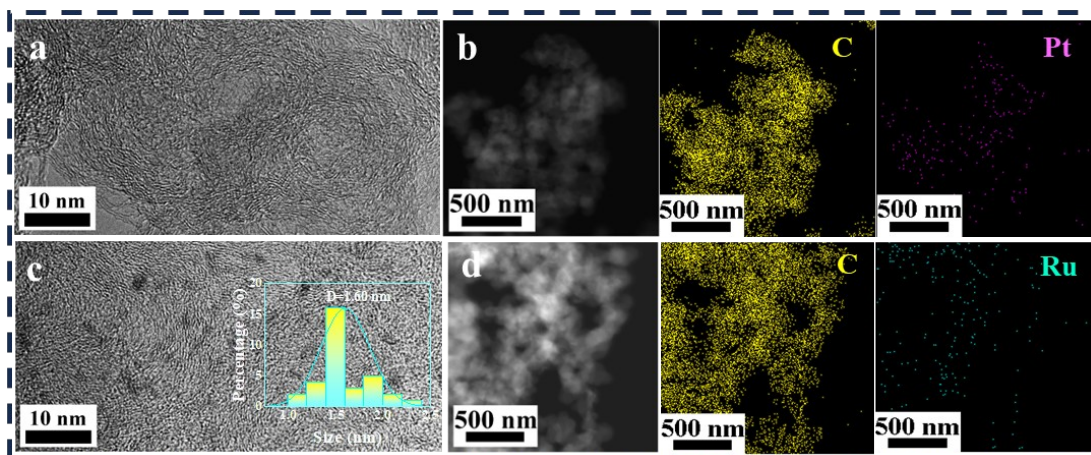

**Fig. S1.** TEM images at a range of magnifications of (a)  $\text{Pt}_1@\text{C}$  and (c)  $\text{Ru}_x@\text{C}$ , respectively.

EDS selected area and corresponding mappings of (c)  $\text{Pt}_1@\text{C}$  (d) and  $\text{Ru}_x@\text{C}$ , respectively.

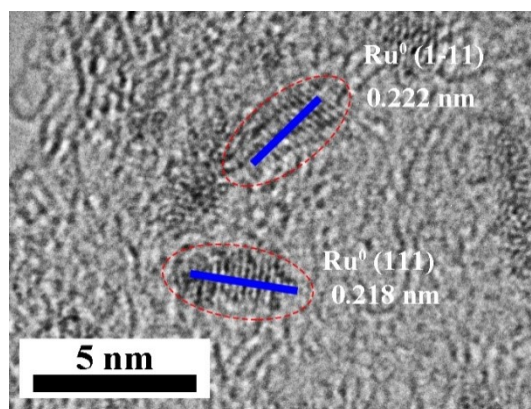

**Fig. S2.** TEM images at a range of magnifications of  $\text{Ru}_x@\text{C}$ .

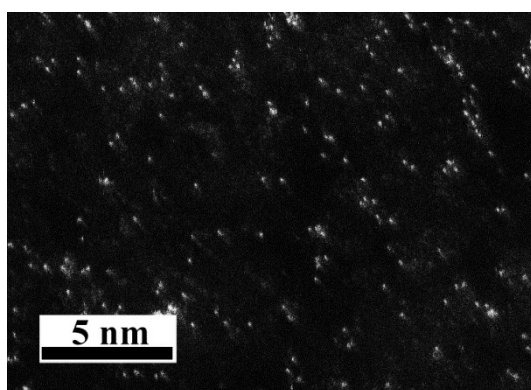

**Fig. S3.** HAADF-STEM image of  $\text{Pt}_1@\text{C}$ .

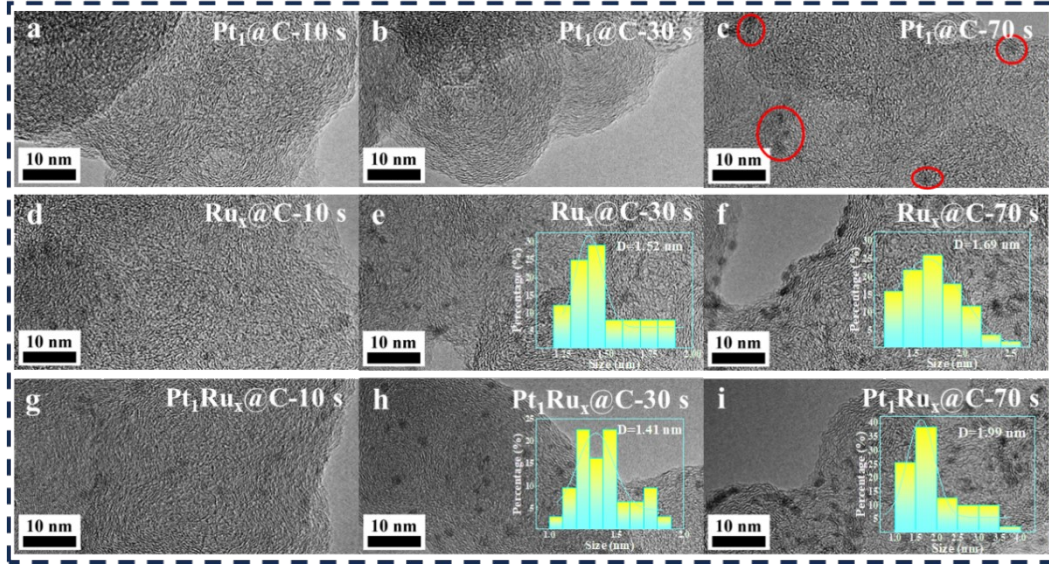

Fig. S4. TEM images of samples under different microwave durations.

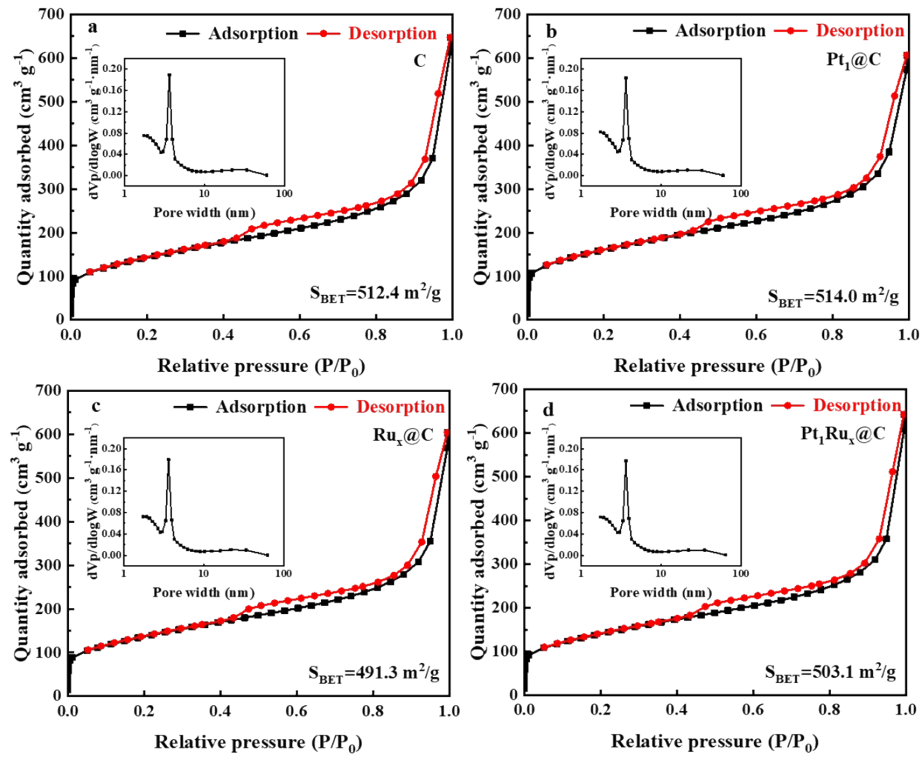

Fig. S5.  $N_2$  adsorption-desorption isotherm curves of samples.

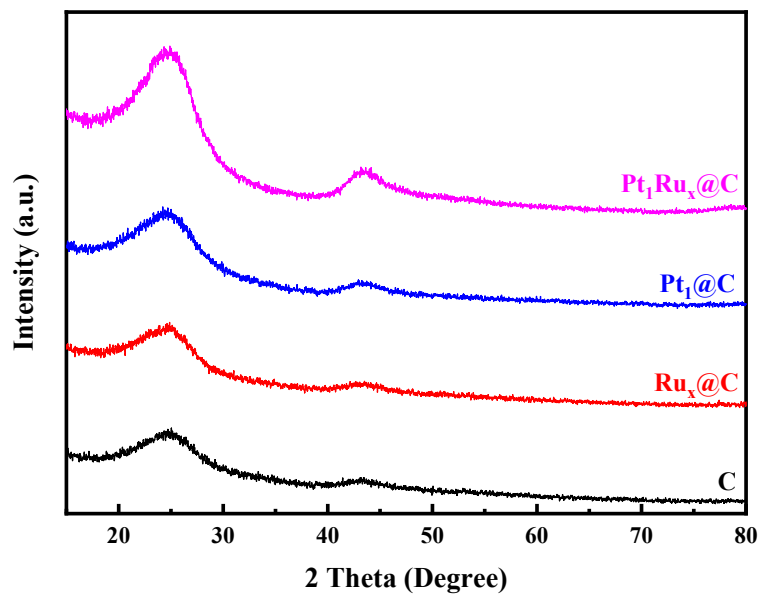

Fig. S6. XRD spectra of Pt<sub>1</sub>Ru<sub>x</sub>@C, Pt<sub>1</sub>@C, Ru<sub>x</sub>@C and C.

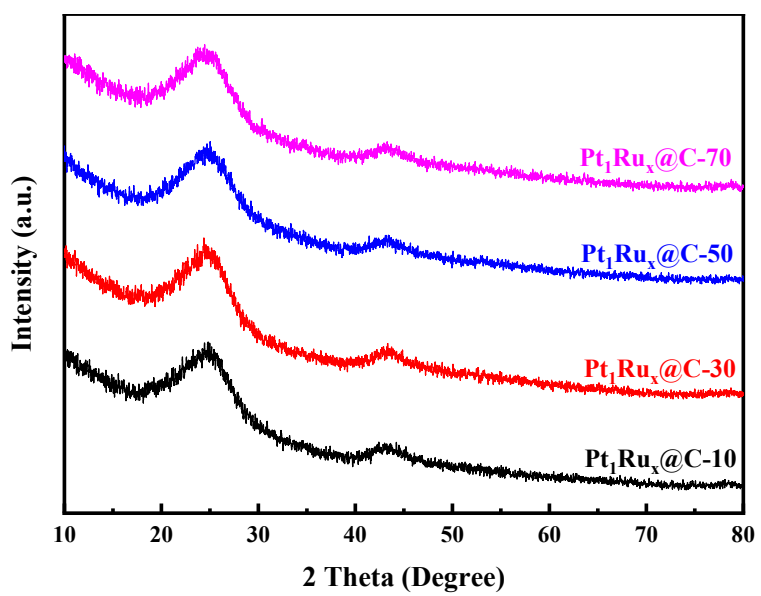

Fig. S7. XRD spectra of Pt<sub>1</sub>Ru<sub>x</sub>@C at different microwave time.

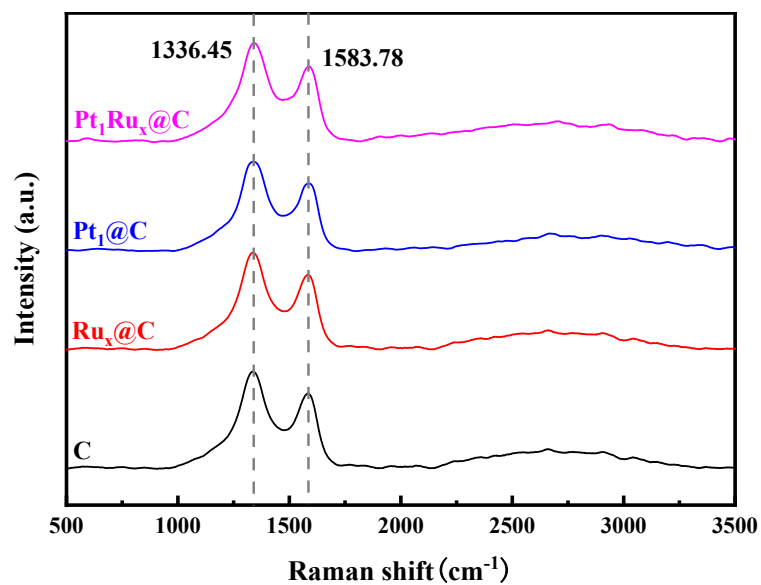

Fig. S8. Raman spectra of Pt<sub>1</sub>Ru<sub>x</sub>@C, Pt<sub>1</sub>@C, Ru<sub>x</sub>@C and C.

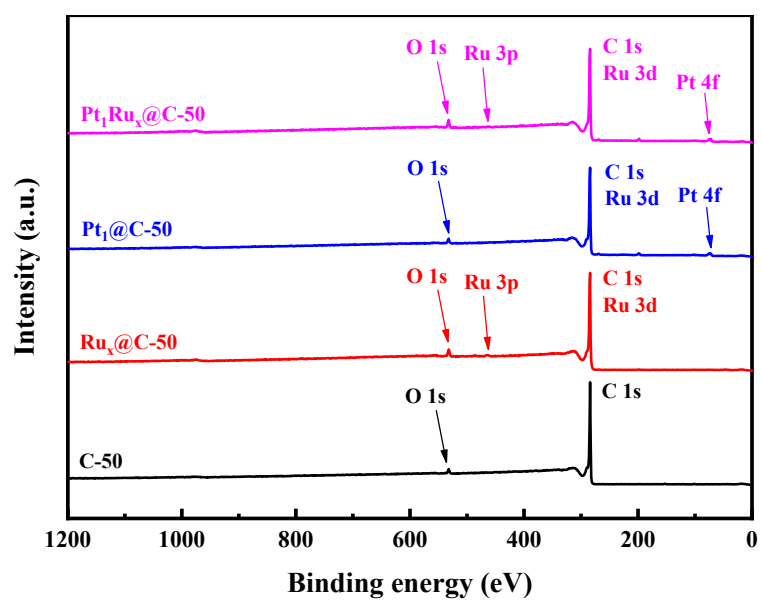

Fig. S9. XPS survey spectra of samples of Pt<sub>1</sub>Ru<sub>x</sub>@C, Pt<sub>1</sub>@C, Ru<sub>x</sub>@C and C.

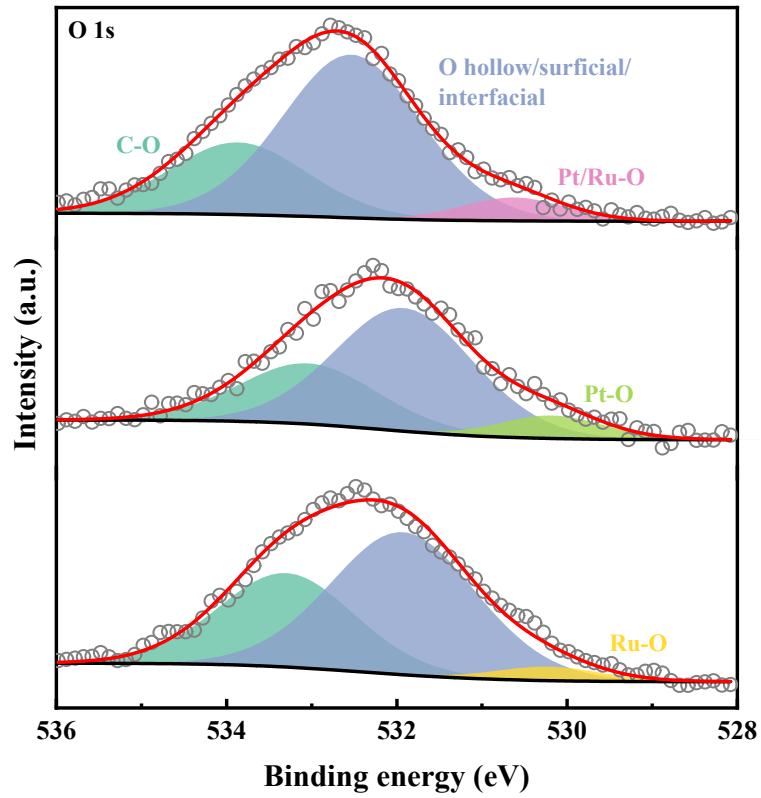

Fig. S10. XPS O 1s spectra of samples.

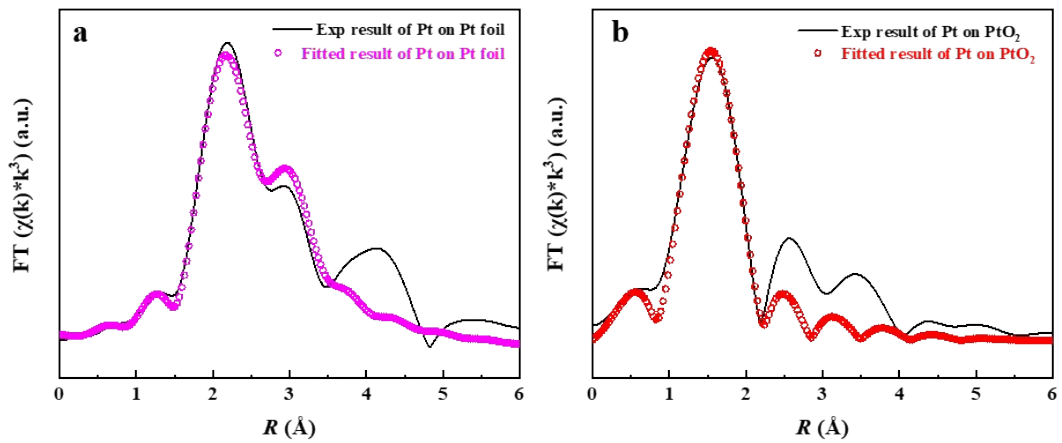

Fig. S11. Fitted spectra of Pt sites in (a) Pt foil and (b) PtO<sub>2</sub>.

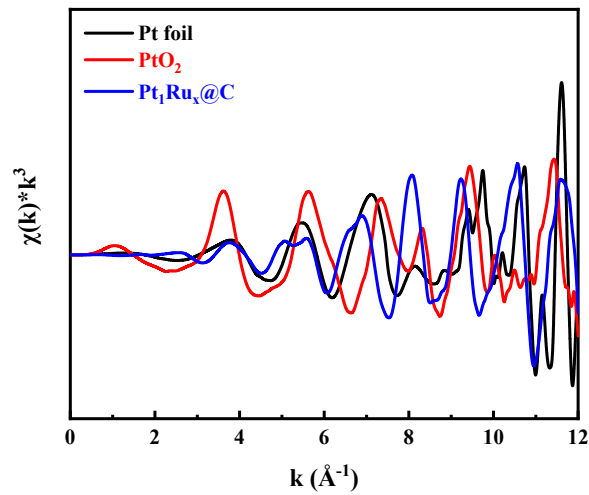

**Fig. S12.** The  $k^3$ -weighted EXAFS in Pt K-space for Pt foil,  $\text{PtO}_2$ , and  $\text{Pt}_1\text{Ru}_x@C$ .

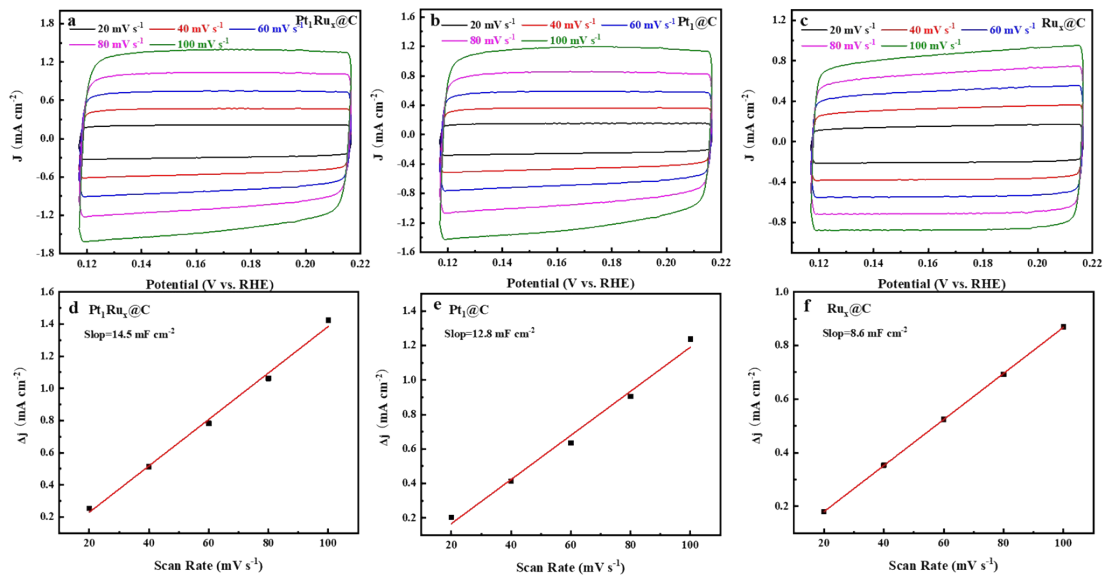

**Fig. S13.** CV curves at different scan rates from 20 to 100  $\text{mV s}^{-1}$  in 0.5 M  $\text{H}_2\text{SO}_4$  and capacitive current at 0.167 V as function of scan rates for (a, d)  $\text{Pt}_1\text{Ru}_x@C$ , (b, e)  $\text{Pt}_1@C$ , and (c, f)  $\text{Ru}_x@C$ .

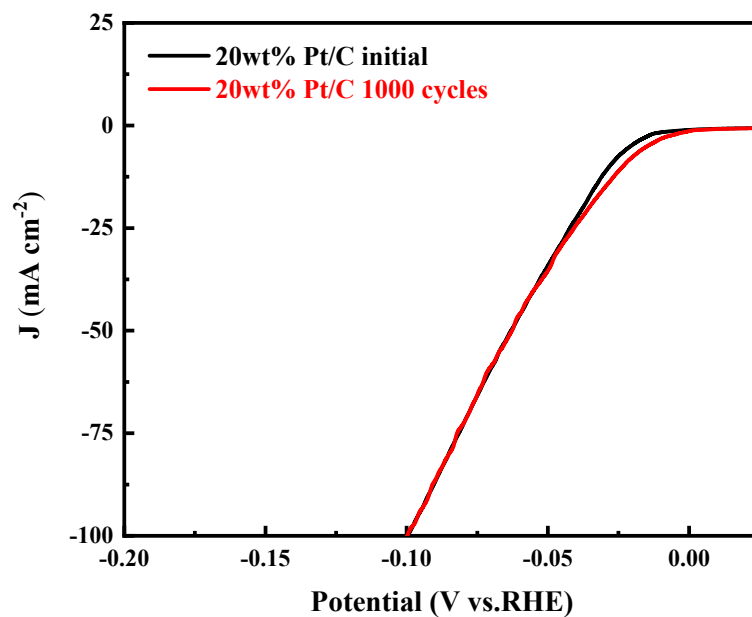

**Fig. S14.** Linear sweep voltammetry curves of 20wt% Pt/C before and after 1,000 CV cycles in 0.5 M H<sub>2</sub>SO<sub>4</sub>.

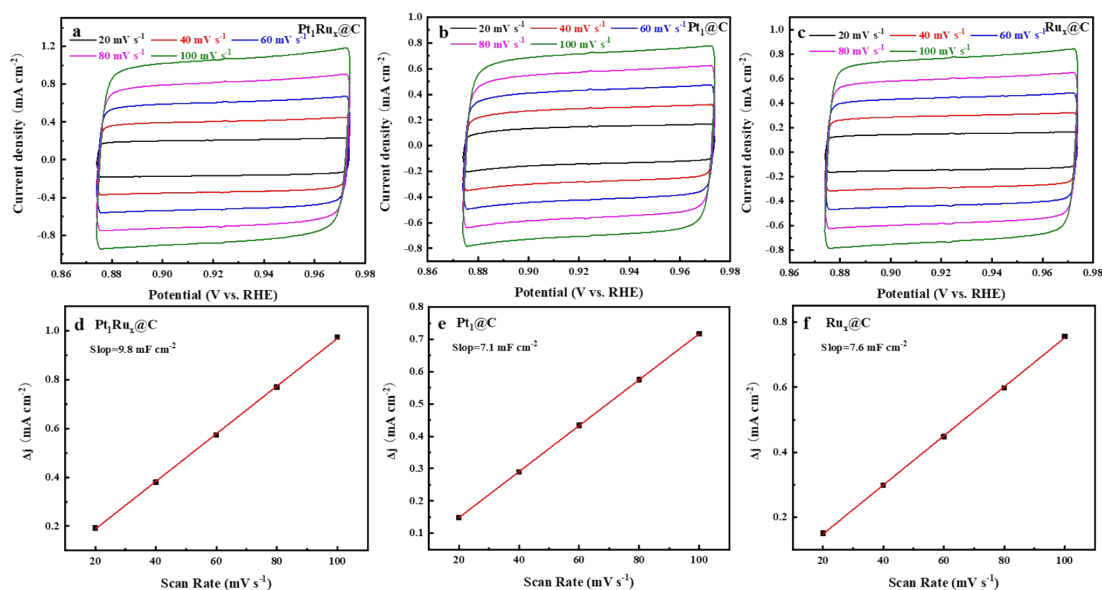

**Fig. S15.** CV curves at different scan rates from 20 to 100 mV s<sup>-1</sup> in 1.0 M KOH and capacitive current at 0.167 V as function of scan rates for (a, d) Pt<sub>1</sub>Ru<sub>x</sub>@C, (b, e) Pt<sub>1</sub>@C, (c, f) and Ru<sub>x</sub>@C.



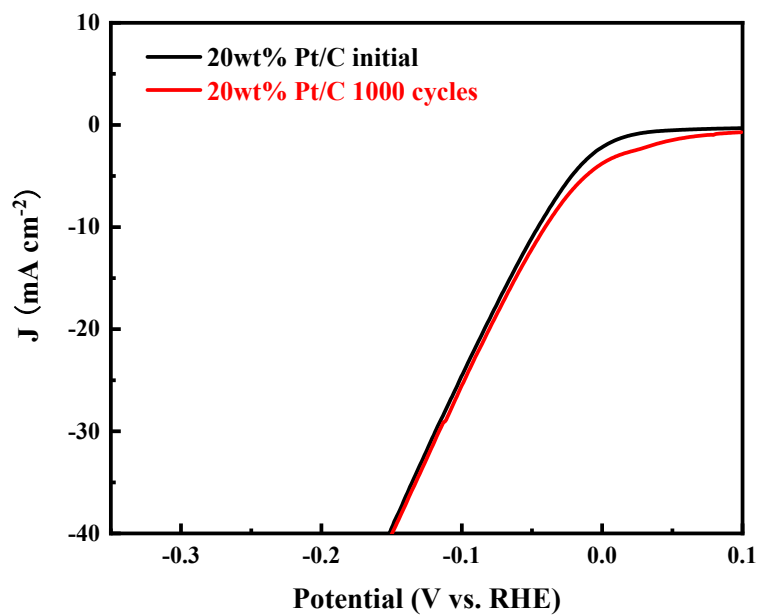

**Fig. S16.** Linear sweep voltammetry curves of 20wt% Pt/C before and after 1,000 CV cycles in 1.0 M KOH.

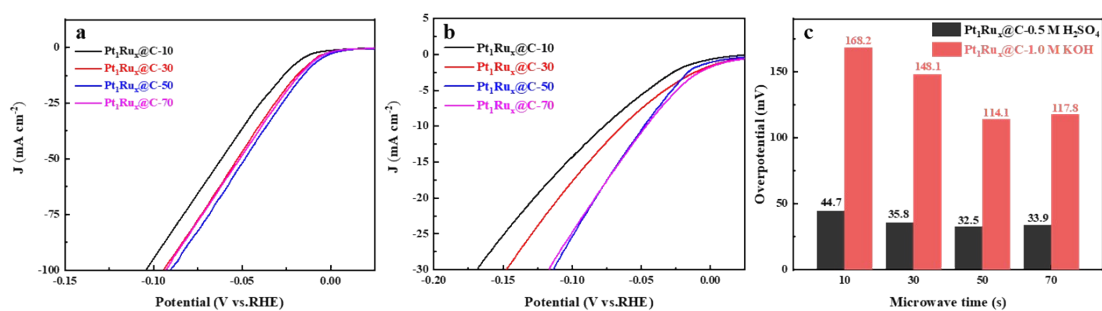

**Fig. S17.** HER performance in 0.5 M H<sub>2</sub>SO<sub>4</sub>/1.0 M KOH solution under different microwave time (a-b) Linear sweep voltammetry curves, (c) overpotentials.

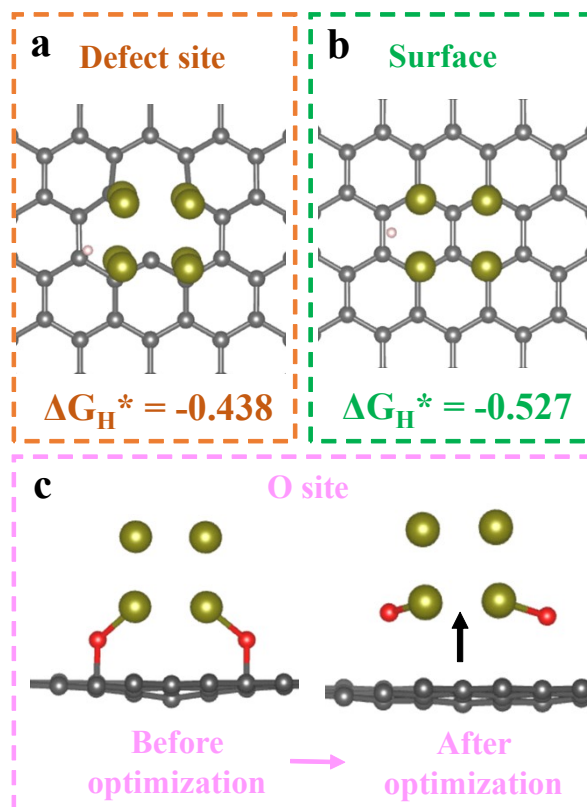

**Fig. S18.** (a-b) Chemisorption atomic models with of H on the surfaces of  $\text{Ru}_x@\text{C}$  at different sites; (c) Optimization process of  $\text{Ru}_x@\text{C}$  with O at site.

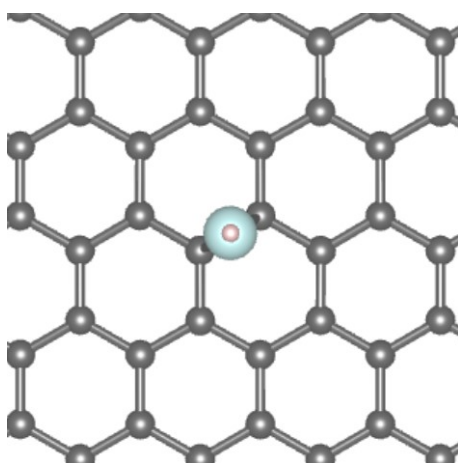

**Fig. S19.** Chemisorption atomic models with of H on the surfaces of  $\text{Pt}_1@\text{C}$  at site3.

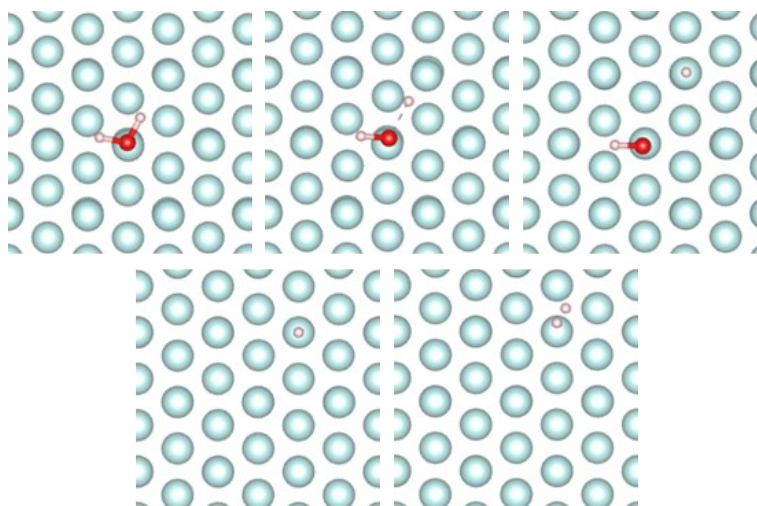

**Fig. S20.** Chemisorption atomic models with of H and OH intermediates on the surfaces of Pt(111).

**Tab. S1.** The content of different kind of Pt and Ru in the catalysts.

| Sample                             | Elements    |             |
|------------------------------------|-------------|-------------|
|                                    | Pt<br>[wt%] | Ru<br>[wt%] |
| Pt <sub>1</sub> @C                 | 5.45        | /           |
| Ru <sub>x</sub> @C                 | /           | 1.49        |
| Pt <sub>1</sub> Ru <sub>x</sub> @C | 4.78        | 1.32        |

**Tab. S2.** The content of different kind of Pt and Ru of Pt<sub>1</sub>Ru<sub>x</sub>@C at different microwave time.

| Sample                                | Elements    |             |
|---------------------------------------|-------------|-------------|
|                                       | Pt<br>[wt%] | Ru<br>[wt%] |
| Pt <sub>1</sub> Ru <sub>x</sub> @C-10 | 2.15        | 0.72        |
| Pt <sub>1</sub> Ru <sub>x</sub> @C-30 | 4.22        | 1.03        |
| Pt <sub>1</sub> Ru <sub>x</sub> @C-70 | 4.80        | 1.26        |

**Tab. S3.** Information on the bands that make up the first-order Raman spectrum of samples.

| Peak | Raman shift         |                    |                    |                                    |
|------|---------------------|--------------------|--------------------|------------------------------------|
|      | [cm <sup>-1</sup> ] |                    |                    |                                    |
|      | C                   | Ru <sub>x</sub> @C | Pt <sub>1</sub> @C | Pt <sub>1</sub> Ru <sub>x</sub> @C |
| G    | 1219.8              | 1224.1             | 1236.3             | 1225.8                             |
| D2   | 1336.9              | 1337.6             | 1343.8             | 1340.8                             |
| D1   | 1504.3              | 1506.9             | 1509.4             | 1509.3                             |
| D3   | 1586.9              | 1589.1             | 1594.1             | 1592.9                             |

**Tab. S4.** The binding energy of Pt 4f, Ru 3p<sub>3/2</sub> and O 1s from XPS.

| Catalysts                          | Binding energy    |                   |                  | Binding energy       |                 | Binding energy |         |
|------------------------------------|-------------------|-------------------|------------------|----------------------|-----------------|----------------|---------|
|                                    | [eV]              |                   | Component        | [eV]                 |                 | [eV]           |         |
|                                    | Pt                | Pt                |                  | Ru 3p <sub>3/2</sub> |                 | O 1s           |         |
|                                    | 4f <sub>7/2</sub> | 4f <sub>5/2</sub> |                  |                      |                 |                |         |
| Pt <sub>1</sub> Ru <sub>x</sub> @C | 72.62             | 76.00             | Pt <sup>2+</sup> | 463.59               | Ru <sup>0</sup> | 530.60         | Pt/Ru-O |
|                                    | 74.51             | 78.01             | Pt <sup>4+</sup> | /                    | /               | /              | /       |
| Pt <sub>1</sub> @C                 | 72.13             | 75.46             | Pt <sup>2+</sup> | /                    | /               | 530.17         | Pt-O    |
|                                    | 74.16             | 77.63             | Pt <sup>4+</sup> | /                    | /               | /              | /       |
| Ru <sub>x</sub> @C                 | /                 | /                 | /                | 463.79               | Ru <sup>0</sup> | 530.22         | Ru-O    |

**Tab. S5.** XAFS parameters of Pt<sub>1</sub>Ru<sub>x</sub>@C, Pt foil and PtO<sub>2</sub>.

| Sample                             | Shell  | N <sup>a)</sup> | R                 | σ <sup>2</sup>                                   | R-factor <sup>d)</sup> |
|------------------------------------|--------|-----------------|-------------------|--------------------------------------------------|------------------------|
|                                    |        |                 | [Å] <sup>b)</sup> | [10 <sup>-3</sup> Å <sup>2</sup> ] <sup>c)</sup> |                        |
| Pt <sub>1</sub> Ru <sub>x</sub> @C | Pt-C/O | 1.5             | 2.51              | 8.42                                             | 0.02                   |
| Pt foil                            | Pt-Pt  | 12              | 2.76              | 1.90                                             | 0.02                   |
| PtO <sub>2</sub>                   | Pt-O   | 6               | 1.99              | 2.35                                             | 0.02                   |

<sup>a)</sup>N, coordination number; <sup>b)</sup>R, distance between absorber and backscattered atoms; <sup>c)</sup>σ<sup>2</sup>, Debye-Waller factor; <sup>d)</sup>R-factor, closeness of the fit, if < 0.05, consistent with broadly correct models. Estimated error: N: ±20%, R: ±0.03.

**Tab. S6.** Summarized acidic/alkaline HER performance of some reported atomic level catalysis with present work.

| Catalyst                                            | Electrolyte                              | $\eta@10 \text{ mA cm}^{-2}$<br>[mV] | Tafel slope<br>[mV dec <sup>-1</sup> ] | Ref.             |
|-----------------------------------------------------|------------------------------------------|--------------------------------------|----------------------------------------|------------------|
| <b>Pt<sub>1</sub>Ru<sub>x</sub>@C</b>               | <b>0.5 M H<sub>2</sub>SO<sub>4</sub></b> | <b>13.15</b>                         | <b>20.7</b>                            | <b>This work</b> |
| <b>Pt<sub>1</sub>Ru<sub>x</sub>@C</b>               | <b>1.0 M KOH</b>                         | <b>48.7</b>                          | <b>55.6</b>                            | <b>This work</b> |
| Fe/GD                                               | 0.5 M H <sub>2</sub> SO <sub>4</sub>     | 66                                   | 37.8                                   | 1                |
| Co <sub>1</sub> /PCN                                | 0.5 M H <sub>2</sub> SO <sub>4</sub>     | 151                                  | 52                                     | 2                |
| NiO/Ni@NCNTs                                        | 0.5 M H <sub>2</sub> SO <sub>4</sub>     | 87.5                                 | 80                                     | 3                |
| Mo@NMCNFs                                           | 0.5 M H <sub>2</sub> SO <sub>4</sub>     | 66                                   | 84.9                                   | 4                |
| PtW <sub>6</sub> /C                                 | 0.5 M H <sub>2</sub> SO <sub>4</sub>     | 22                                   | /                                      | 5                |
| Pt-Ru dimer                                         | 0.5 M H <sub>2</sub> SO <sub>4</sub>     | 50                                   | 28.9                                   | 6                |
| Pt <sub>1</sub> @Fe-C                               | 0.5 M H <sub>2</sub> SO <sub>4</sub>     | 60                                   | 42                                     | 7                |
| Pt <sub>1</sub> /Ti <sub>1-x</sub> O <sub>2</sub>   | 0.5 M H <sub>2</sub> SO <sub>4</sub>     | 22.2                                 | 31                                     | 8                |
| PtNi-NC                                             | 0.5 M H <sub>2</sub> SO <sub>4</sub>     | 30                                   | 27                                     | 9                |
| NeC@CoP/Ni <sub>2</sub> P                           | 0.5 M H <sub>2</sub> SO <sub>4</sub>     | 153                                  | 53.01                                  | 10               |
| Cu/Ru@G <sub>N</sub>                                | 0.5 M H <sub>2</sub> SO <sub>4</sub>     | 10                                   | 25                                     | 11               |
| W <sub>1</sub> Mo <sub>1</sub> -NG                  | 1.0 M KOH                                | 67                                   | 45                                     | 12               |
| Ir <sub>1</sub> @Co/NC                              | 1.0 M KOH                                | 55                                   | 119                                    | 13               |
| Ru-SA/Ti <sub>3</sub> C <sub>2</sub> T <sub>x</sub> | 1.0 M KOH                                | 70                                   | 27.7                                   | 14               |
| Ru/Ni-MoS <sub>2</sub>                              | 1.0 M KOH                                | 32                                   | 41                                     | 15               |
| Ru/Co-CAT/CC                                        | 1.0 M KOH                                | 38                                   | /                                      | 16               |
| Ru-MoS <sub>2</sub> /CC                             | 1.0 M KOH                                | 41                                   | 114                                    | 17               |
| Ru-W/WO <sub>2</sub> -800                           | 1.0 M KOH                                | 11                                   | 31.3                                   | 18               |
| 12%Rh-Co <sub>2</sub> Fe-P                          | 1.0 M KOH                                | 48                                   | 53                                     | 19               |
| Fe-N <sub>4</sub> SAs/NPC                           | 1.0 M KOH                                | 202                                  | 123                                    | 20               |
| Co <sub>1</sub> /PCN                                | 1.0 M KOH                                | 89                                   | /                                      | 2                |

## References

1. Y. Xue, B. Huang, Y. Yi, Y. Guo, Z. Zuo, Y. Li, Z. Jia, H. Liu and Y. Li, *Nat. Commun.*, 2018,

- 9, 1460.
2. L. Cao, Q. Luo, W. Liu, Y. Lin, X. Liu, Y. Cao, W. Zhang, Y. Wu, J. Yang and T. Yao, *Nat. Catal.*, 2019, **2**, 134-141.
  3. J. Wang, X. Ge, L. Shao, J. Zhang, D. Peng, G. Zou, H. Hou, W. Deng, S. Xu, X. Ji and W. Zhang, *Mater. Today Energy*, 2020, **17**.
  4. T. F. Li, T. Y. Lu, X. Li, L. Xu, Y. W. Zhang, Z. Q. Tian, J. Yang, H. Pang, Y. W. Tang and J. M. Xue, *ACS Nano*, 2021, **15**, 20032-20041.
  5. F.-Y. Yu, Z.-L. Lang, Y.-J. Zhou, K. Feng, H.-Q. Tan, J. Zhong, S.-T. Lee, Z.-H. Kang and Y.-G. Li, *ACS Energy Lett.*, 2021, **6**, 4055-4062.
  6. L. Zhang, R. T. Si, H. S. Liu, N. Chen, Q. Wang, K. Adair, Z. Q. Wang, J. T. Chen, Z. X. Song, J. J. Li, M. N. Banis, R. Y. Li, T. K. Sham, M. Gu, L. M. Liu, G. A. Botton and X. L. Sun, *Nat. Commun.*, 2019, **10**.
  7. X. Zeng, J. Shui, X. Liu, Q. Liu, Y. Li, J. Shang, L. Zheng and R. Yu, *Adv. Energy Mater.*, 2018, **8**, 1701345.
  8. F. Lu, D. Yi, S. J. Liu, F. Zhan, B. Zhou, L. Gu, D. Golberg, X. Wang and J. N. Yao, *Angew. Chem., Int. Ed.*, 2020, **59**, 17712-17718.
  9. Y. M. Da, Z. L. Tian, R. Jiang, Y. Liu, X. Lian, S. B. Xi, Y. Shi, Y. P. Wang, H. T. Lu, B. H. Cui, J. F. Zhang, X. P. Han, W. Chen and W. B. Hu, *Sci. China Mater.*, 2023, **66**, 1389-1397.
  10. T. Feng, F. Wang, Y. Xu, M. Chang, X. Jin, z. Yulin, J. Piao and J. Lei, *Int. J. Hydrogen Energy*, 2021, **46**, 8431-8443.
  11. A. M. Harzandi, S. Shadman, M. Ha, C. W. Myung, D. Y. Kim, H. J. Park, S. Sultan, W.-S. Noh, W. Lee, P. Thangavel, W. J. Byun, S.-h. Lee, J. N. Tiwari, T. J. Shin, J.-H. Park, Z. Lee, J. S. Lee and K. S. Kim, *Appl. Catal., B*, 2020, **270**, 118896.
  12. Y. Yang, Y. Qian, H. Li, Z. Zhang, Y. Mu, D. Do, B. Zhou, J. Dong, W. Yan, Y. Qin, L. Fang, R. Feng, J. Zhou, P. Zhang, J. Dong, G. Yu, Y. Liu, X. Zhang and X. Fan, *Sci. Adv.*, 2020, **6**, eaba6586.
  13. W.-H. Lai, L.-F. Zhang, W.-B. Hua, S. Indris, Z.-C. Yan, Z. Hu, B. Zhang, Y. Liu, L. Wang, M. Liu, R. Liu, Y.-X. Wang, J.-Z. Wang, Z. Hu, H.-K. Liu, S.-L. Chou and S.-X. Dou, *Angew. Chem., Int. Ed.*, 2019, **58**, 11868-11873.
  14. X. Peng, S. Zhao, Y. Mi, L. Han, X. Liu, D. Qi, J. Sun, Y. Liu, H. Bao, L. Zhuo, H. L. Xin, J.

- Luo and X. Sun, *Small*, 2020, **16**, 2002888.
15. B. Guo, R. Ma, Z. Li, J. Luo, M. Yang and J. Wang, *Mater. Chem. Front.*, 2020, **4**, 1390-1396.
  16. Y. He, F. Yan, X. Zhang, C. Zhu, Y. Zhao, B. Geng, S. Chou, Y. Xie and Y. Chen, *Adv. Energy Mater.*, 2023, **13**, 2204177.
  17. D. W. Wang, Q. Li, C. Han, Z. C. Xing and X. R. Yang, *Appl. Catal., B*, 2019, **249**, 91-97.
  18. W. L. Ma, X. Y. Yang, D. D. Li, R. X. Xu, L. P. Nie, B. P. Zhang, Y. Wang, S. Wang, G. Wang, J. X. Diao, L. R. Zheng, J. B. Bai, K. Y. Leng, X. L. Li and Y. T. Qu, *Adv. Sci.*, 2023.
  19. L. Li, Y. Lu, X. Liu, X. Wang and S. Zhou, *J. Alloys Compd.*, 2022, **895**, 162549.
  20. Y. Pan, S. Liu, K. Sun, X. Chen, B. Wang, K. Wu, X. Cao, W. C. Cheong, R. Shen and A. Han, *Angew. Chem., Int. Ed.*, 2018, **57**, 8614-8618.
